# Supplementary material for: Functional carbon nanosheets prepared from hexayne amphiphile monolayers at room temperature
Source: Springer Nature journal article supplement (doi:10.1038/nchem.1939), 2014-05-04
Supplement: 41557_2014_BFnchem1939_MOESM1_ESM.mol [file 41557_2014_BFnchem1939_MOESM1_ESM.mol]

  ChemDraw04151406483D

 31 30  0  0  0  0  0  0  0  0999 V2000
   -9.4871   -1.1572    0.0859 C   0  0  0  0  0  0  0  0  0  0  0  0
   -9.0747   -0.4430    0.0859 O   0  0  0  0  0  0  0  0  0  0  0  0
   -9.0760   -1.8691    0.0859 C   0  0  0  0  0  0  0  0  0  0  0  0
   -8.2513   -1.8691    0.0859 C   0  0  0  0  0  0  0  0  0  0  0  0
   -7.8386   -2.5835    0.0859 C   0  0  0  0  0  0  0  0  0  0  0  0
   -7.0139   -2.5835    0.2115 C   0  0  0  0  0  0  0  0  0  0  0  0
   -6.1918   -2.5835    0.2115 C   0  0  0  0  0  0  0  0  0  0  0  0
   -5.3699   -2.5835    0.2115 C   0  0  0  0  0  0  0  0  0  0  0  0
   -4.5478   -2.5835    0.2115 C   0  0  0  0  0  0  0  0  0  0  0  0
   -3.7257   -2.5835    0.2115 C   0  0  0  0  0  0  0  0  0  0  0  0
   -2.9035   -2.5835    0.2115 C   0  0  0  0  0  0  0  0  0  0  0  0
   -2.0814   -2.5835    0.2115 C   0  0  0  0  0  0  0  0  0  0  0  0
   -1.2593   -2.5835    0.2115 C   0  0  0  0  0  0  0  0  0  0  0  0
   -0.4371   -2.5835    0.2115 C   0  0  0  0  0  0  0  0  0  0  0  0
    0.3850   -2.5835    0.2115 C   0  0  0  0  0  0  0  0  0  0  0  0
    1.2071   -2.5835    0.2115 C   0  0  0  0  0  0  0  0  0  0  0  0
    2.0293   -2.5835    0.2115 C   0  0  0  0  0  0  0  0  0  0  0  0
   10.9787    2.5835    0.2975 C   0  0  0  0  0  0  0  0  0  0  0  0
   10.4815    1.7223    0.2975 C   0  0  0  0  0  0  0  0  0  0  0  0
    9.4871    1.7223    0.2975 C   0  0  0  0  0  0  0  0  0  0  0  0
    8.9899    0.8612    0.2975 C   0  0  0  0  0  0  0  0  0  0  0  0
    7.9955    0.8612    0.2975 C   0  0  0  0  0  0  0  0  0  0  0  0
    7.4983   -0.0000    0.2975 C   0  0  0  0  0  0  0  0  0  0  0  0
    6.5040   -0.0000    0.2975 C   0  0  0  0  0  0  0  0  0  0  0  0
    6.0068   -0.8612    0.2975 C   0  0  0  0  0  0  0  0  0  0  0  0
    5.0124   -0.8612    0.2975 C   0  0  0  0  0  0  0  0  0  0  0  0
    4.5152   -1.7223    0.2975 C   0  0  0  0  0  0  0  0  0  0  0  0
    3.5208   -1.7223    0.2975 C   0  0  0  0  0  0  0  0  0  0  0  0
    3.0237   -2.5835    0.2975 C   0  0  0  0  0  0  0  0  0  0  0  0
  -10.4815   -1.1572   -0.2975 O   0  0  0  0  0  0  0  0  0  0  0  0
  -10.9787   -0.2961   -0.2975 C   0  0  0  0  0  0  0  0  0  0  0  0
 30  1  1  0      
  1  2  2  0      
  1  3  1  0      
  3  4  1  0      
  4  5  1  0      
  5  6  1  0      
  6  7  3  0      
  7  8  1  0      
  8  9  3  0      
  9 10  1  0      
 10 11  3  0      
 11 12  1  0      
 12 13  3  0      
 13 14  1  0      
 14 15  3  0      
 15 16  1  0      
 16 17  3  0      
 17 29  1  0      
 28 29  1  0      
 27 28  1  0      
 26 27  1  0      
 25 26  1  0      
 24 25  1  0      
 23 24  1  0      
 22 23  1  0      
 21 22  1  0      
 20 21  1  0      
 19 20  1  0      
 18 19  1  0      
 30 31  1  0      
M  END
